# Supplementary material for: Elevated risk of stillbirth in males: systematic review and meta-analysis of more than 30 million births
Source: Springer Nature journal article supplement (doi:10.1186/s12916-014-0220-4), 2014-11-21

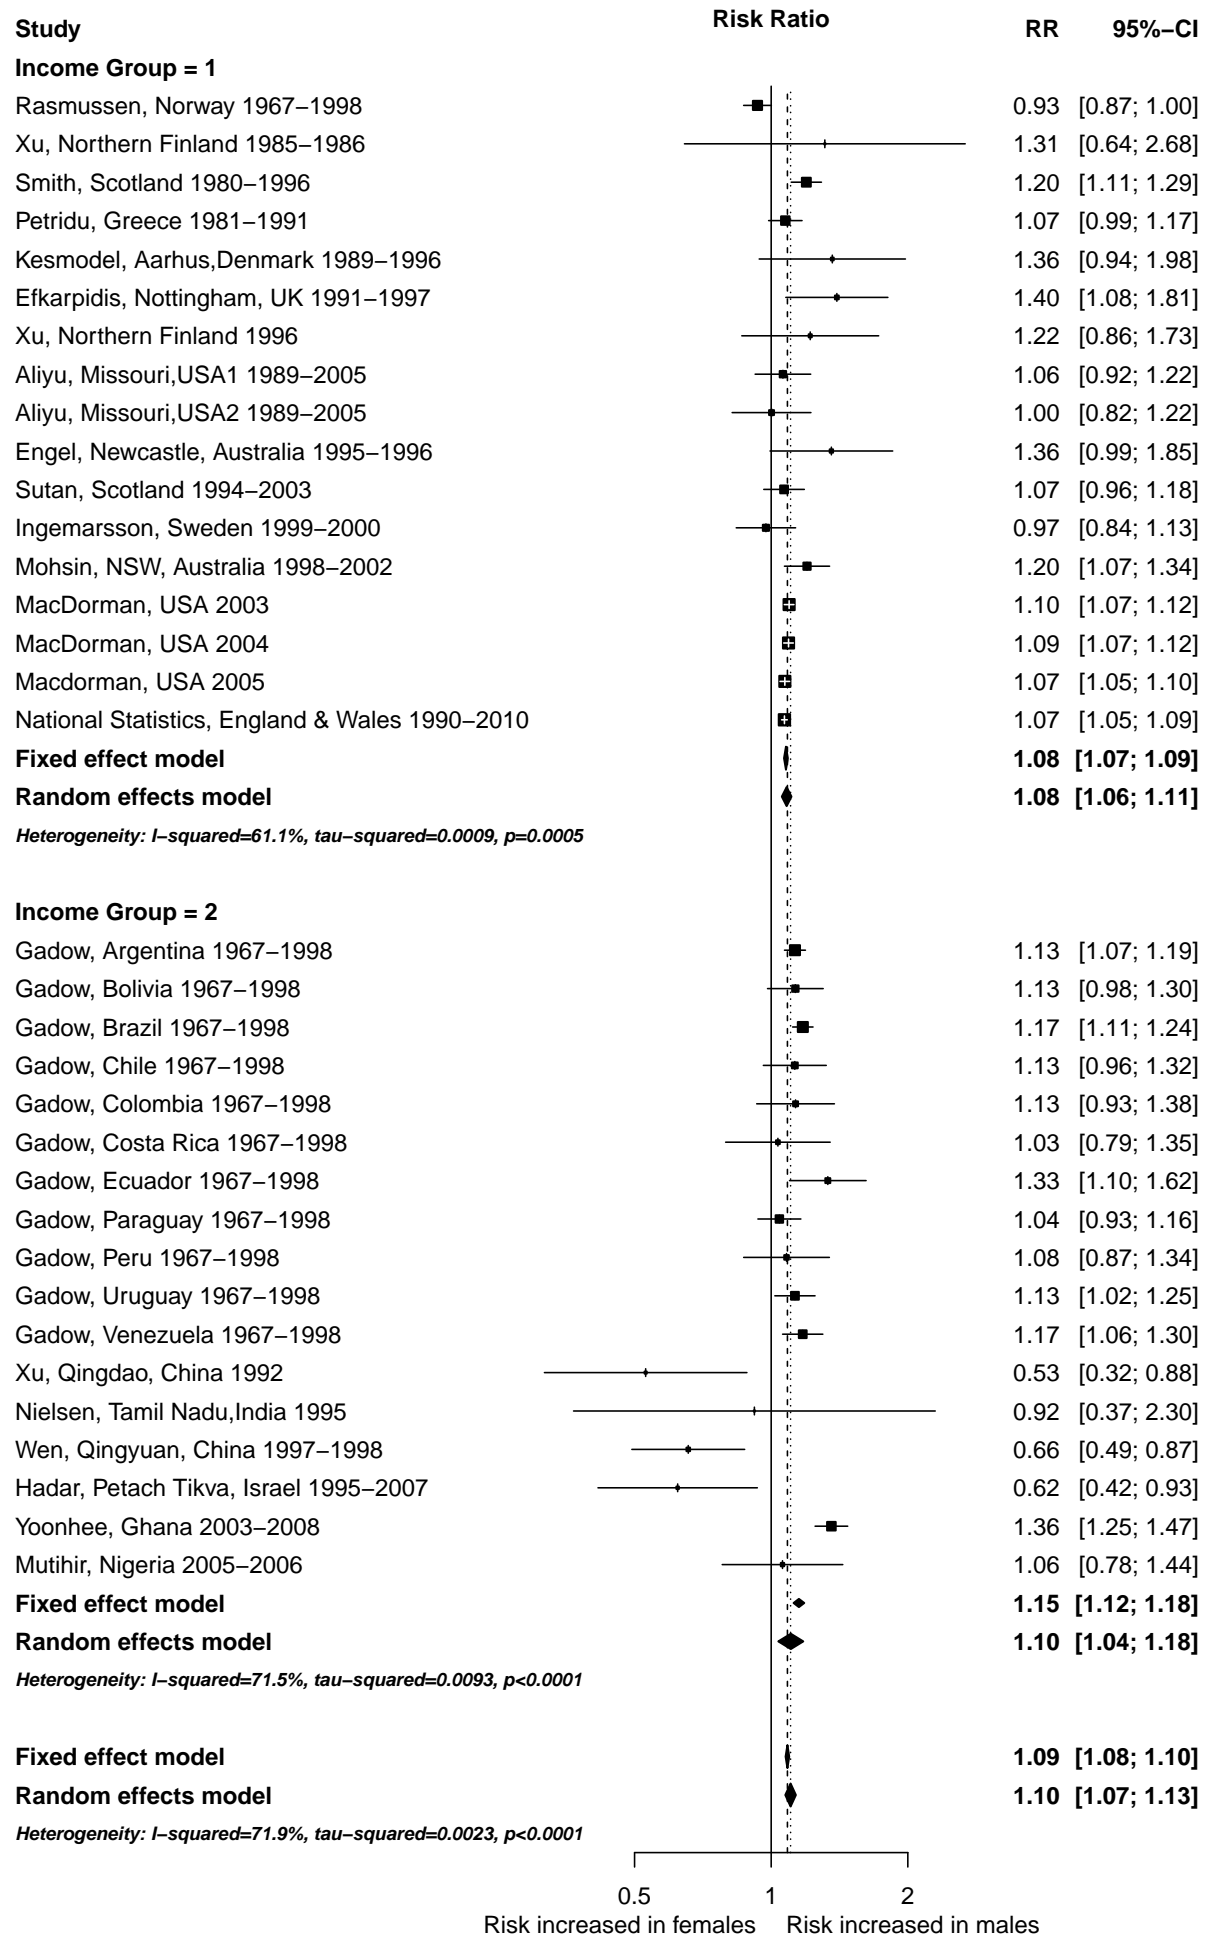

Supplement: MOESM2 [file 9758594]
